# Supplementary material for: Critical role of the first transmembrane domain of Cx26 in regulating oligomerization and function
Source: PubMed Central journal article supplement — Mol Biol Cell. 2012 Sep 1;23(17):3299–311. doi: 10.1091/mbc.E11-12-1058 (PMC3431943; doi:10.1091/mbc.e11-12-1058), 2012-09-01
Supplement: supp_E11-12-1058_CombinedSupMats.pdf [file supp_E11-12-1058_CombinedSupMats.pdf]

**Supplemental Table 1**

| <b>TOXCAT construct</b>  | <b>PCR primers</b>                                                                                                                                                                   |
|--------------------------|--------------------------------------------------------------------------------------------------------------------------------------------------------------------------------------|
| <i>rCx26-TM1</i>         | <i>sense</i> AAGCTAGCATTGGGAAAATCTGGCTCACT<br><i>antisense</i> TTGGATCCCCGCGGCCACCACGAGGATCAT                                                                                        |
| <i>rCx26-TM2</i>         | <i>sense</i> AAGCTAGCCTCTGGGCTCTGCAGCTGATC<br><i>antisense</i> TTGGATCCCCGCGGCCACGTGCATAGCTACCAG                                                                                     |
| <i>rCx26-TM3</i>         | <i>sense</i> AAGCTAGCGTCATCTTCGAAGCTGTCTTC<br><i>antisense</i> TTGGATCCCCTGCATGAAGAAGCCATTGTA                                                                                        |
| <i>rCx26-TM3 A</i>       | <i>sense</i> AAGCTAGCCTGTGGTGGACCTACACCACC<br><i>antisense</i> TTGGATCCCCGAAGACAGCTTCGAAGAT                                                                                          |
| <i>rCx26-TM4</i>         | <i>sense</i> AAGCTAGCGTCTTCACGGTGTTTCATGATC<br><i>antisense</i> TTGGATCCCCAGCTCTGTGATGTTTAGCAG                                                                                       |
| <i>rCx43-TM1</i>         | <i>sense</i> AAGCTAGCACCGCTGGAGGGAAGGTGTGG<br><i>antisense</i> TTGGATCCCAACAGCTGTCCCAGGAGCAG                                                                                         |
| <i>rCx43-TM1 A</i>       | <i>sense</i> AAGCTAGCGGAGGGAAGGTGTGGCTGTCA<br><i>antisense</i> TTGGATCCCCAGGAGCAGGATTCTGAA                                                                                           |
|                          | <b>Re-annealing primers</b>                                                                                                                                                          |
| <i>TM1 Cx26Del VVAA</i>  | <i>sense</i> CTAGCGGAAAATCTGGCTCACTGTCCTCTTCATCTTCCGCAT<br>CATGATCCTCCG<br><i>antisense</i> GATCCGGAGGATCATGATGCGGAAGATGAAGAGGACAGT<br>GAGCCAGATTTTCCCG                              |
| <i>TM1Cx26GTAV</i>       | <i>sense</i> CTAGCGGAAAATCTGGCTCACTGTCCTCTTCATCTTCCGCAT<br>CATGATCCTCGGGACAGCTGTTTCG<br><i>antisense</i> GATCCGAACAGCTGTCCCAGGATCATGATGCGGAAGATG<br>AAGAGGACAGTGAGCCAGATTTTCCCG      |
| <i>TM1Cx26V37I</i>       | <i>sense</i> CTAGCGGAAAATCTGGCTCACTGTCCTCTTCATCTTCCGCAT<br>CATGATCCTCATA GTGGCCGCGCG<br><i>antisense</i> GATCCGCGCGGCCACTATGAGGATCATGATGCGGAAGATG<br>AAGAGGACAGTGAGCCAGATTTTCCCG     |
| <i>TM1Cx26A40G</i>       | <i>sense</i> CTAGCGGAAAATCTGGCTCACTGTCCTCTTCATCTTCCGCAT<br>CATGATCCTCGTGGTGGCCGGGCGGGATC<br><i>antisense</i> GATCCGCCCGGCCACCACGAGGATCATGATGCGGAAGAT<br>GAAGAGGACAGTGAGCCAGATTTTCCCG |
| <b>Mutant construct</b>  | <b>Primers</b>                                                                                                                                                                       |
| <i>Cx26 GTAV</i>         | <i>sense</i> GCCGTTAAGGAGGTGTGGGGAGATGAGCAAGCCGAT<br><i>antisense</i> TGTGCCGAGGATCATGATGCGGAAGATGAAGAGGAC                                                                           |
| <i>Cx26V37I-GFP</i>      | <i>sense</i> CGCATCATGATCCTCATA GTGGCCGCGAAGGAGG<br><i>antisense</i> CCTCCTTCGCGGCCACTATGAGGATCATGATGCG                                                                              |
| <i>Cx26A40G-GFP</i>      | <i>antisense</i> TCCCCACACCTCCTTCCC GGCCACCACGAGGAT<br><i>sense</i> ATCCTCGTGGTGGCCGGGAAGGAGGTGTGGGGA                                                                                |
| <i>Cx26V37C-GFP</i>      | <i>sense</i> CGCATCATGATCCTCTGTGTGGCCGCGAAGGAGGTG<br><i>antisense</i> CACCTCCTTCGCGGCCACACAGAGGATCATGATGCG                                                                           |
| <i>Cx26A40C-GFP</i>      | <i>sense</i> GATCCTCGTCGTGGCCGTGAAGGAGGTGTGGGG<br><i>antisense</i> CCCCACACCTCCTTACAGGCCACGACGAGGATC                                                                                 |
| <b>Sequencing primer</b> | GAATACGCAGAATCAAGCAGTGTG                                                                                                                                                             |
